# Supplementary material
Source: HighWire-hosted journal article supplement (https://bmjopen.bmj.com/content/12/3/e052943)
Supplement: inline-supplementary-material-7 [file inline-supplementary-material-7.pdf]

Supplementary Table 4: Results from Delphi Survey Round 2

| Domain                                                        | Outcome <sup>1</sup>                                    | Consensus    | Percentage (%) of responders who scored 7-9 |        |         | Percentage (%) of responders who scored 1-3 |        |         |
|---------------------------------------------------------------|---------------------------------------------------------|--------------|---------------------------------------------|--------|---------|---------------------------------------------|--------|---------|
|                                                               |                                                         |              | Medical                                     | Nurses | Parents | Medical                                     | Nurses | Parents |
| Physiological or clinical (general symptoms)                  | Appearance                                              | In           | 72                                          | 86     | 71      | 1                                           | 2      | 14      |
|                                                               | Change to bowel habit                                   | Out          | 1                                           | 0      | 14      | 83                                          | 71     | 14      |
|                                                               | General medical illness (excluding respiratory illness) | No consensus | 36                                          | 45     | 71      | 2                                           | 5      | 0       |
|                                                               | Fever                                                   | Out          | 18                                          | 38     | 29      | 5                                           | 0      | 0       |
|                                                               | Fit/convulsion                                          | No consensus | 34                                          | 55     | 100     | 9                                           | 2      | 0       |
|                                                               | Weight                                                  | No consensus | 20                                          | 21     | 71      | 8                                           | 10     | 14      |
|                                                               | Level of consciousness                                  | In           | 90                                          | 88     | 100     | 1                                           | 0      | 0       |
|                                                               | Pain and discomfort                                     | No consensus | 28                                          | 36     | 86      | 2                                           | 0      | 0       |
|                                                               | Sedation/sedation withdrawal                            | No consensus | 27                                          | 46     | 71      | 9                                           | 11     | 14      |
|                                                               | Non-respiratory physiological parameters/vital signs    | In           | 86                                          | 90     | 100     | 1                                           | 0      | 0       |
|                                                               | Parent report of symptoms and/or resolution of illness  | No consensus | 63                                          | 64     | 71      | 0                                           | 0      | 0       |
|                                                               | Worsening illness                                       | In           | 94                                          | 98     | 100     | 0                                           | 0      | 0       |
| Physiological and clinical (feeding; nutrition and hydration) | Feeding                                                 | In           | 84                                          | 83     | 100     | 1                                           | 2      | 0       |
|                                                               | Need for fluids given through a drip                    | No consensus | 80                                          | 85     | 67      | 1                                           | 2      | 0       |
|                                                               | Need for feeding tube                                   | In           | 81                                          | 88     | 83      | 1                                           | 2      | 0       |
|                                                               | Inhalation (breathing in) of milk; fluids or solids     | In           | 76                                          | 95     | 100     | 1                                           | 0      | 0       |
|                                                               | Reduced urine output                                    | No consensus | 61                                          | 79     | 83      | 1                                           | 2      | 0       |
| Physiological and clinical (Respiratory distress)             | Apnoea                                                  | In           | 97                                          | 98     | 100     | 0                                           | 0      | 0       |
|                                                               | Blood gas sampling                                      | No consensus | 41                                          | 45     | 86      | 3                                           | 2      | 0       |
|                                                               | Oxygen saturation                                       | In           | 94                                          | 98     | 86      | 0                                           | 0      | 0       |
|                                                               | Bronchiolitis severity score                            | No consensus | 60                                          | 68     | 100     | 3                                           | 2      | 0       |
|                                                               | Cyanosis                                                | In           | 90                                          | 95     | 100     | 1                                           | 0      | 0       |
|                                                               | Respiratory sounds                                      | No consensus | 34                                          | 76     | 86      | 6                                           | 2      | 0       |
|                                                               | Effort of breathing                                     | In           | 92                                          | 98     | 100     | 0                                           | 0      | 0       |
|                                                               | Paediatric Early Warning (PEW) score                    | In           | 72                                          | 88     | 100     | 5                                           | 0      | 0       |
| Physiological and clinical (short term symptoms)              | Cough                                                   | Out          | 7                                           | 14     | 33      | 17                                          | 10     | 0       |

| Domain                                                                | Outcome <sup>1</sup>                  | Consensus    | Percentage (%) of responders who scored 7-9 |        |         | Percentage (%) of responders who scored 1-3 |        |         |
|-----------------------------------------------------------------------|---------------------------------------|--------------|---------------------------------------------|--------|---------|---------------------------------------------|--------|---------|
|                                                                       |                                       |              | Medical                                     | Nurses | Parents | Medical                                     | Nurses | Parents |
| Physiological and clinical (respiratory infections and complications) | Additional chest infections/pneumonia | No consensus | 66                                          | 83     | 100     | 1                                           | 0      | 0       |
| Physiological and clinical (respiratory interventions and support)    | Need for respiratory support          | In           | 98                                          | 98     | 100     | 0                                           | 0      | 0       |
|                                                                       | Length of time spent on oxygen        | No consensus | 25                                          | 39     | 100     | 4                                           | 5      | 0       |
|                                                                       | Physiotherapy                         | No consensus | 24                                          | 39     | 67      | 10                                          | 5      | 0       |
|                                                                       | Suctioning                            | No consensus | 38                                          | 71     | 83      | 4                                           | 0      | 0       |
|                                                                       | Need for other treatments             | No consensus | 32                                          | 46     | 83      | 4                                           | 0      | 0       |
|                                                                       | Need for viral test                   | No consensus | 16                                          | 17     | 67      | 14                                          | 10     | 0       |
|                                                                       | Need for medical tests                | No consensus | 15                                          | 24     | 83      | 10                                          | 2      | 0       |
| Physiological or clinical (long term conditions)                      | Recurrent wheeze                      | Out          | 36                                          | 24     | 40      | 3                                           | 0      | 0       |
|                                                                       | Asthma                                | No consensus | 35                                          | 17     | 60      | 2                                           | 2      | 0       |
| Physiological and clinical (blood and immune)                         | Atopic conditions                     | No consensus | 14                                          | 12     | 60      | 10                                          | 5      | 0       |
|                                                                       | Allergic sensitisation                | No consensus | 10                                          | 10     | 60      | 12                                          | 7      | 0       |
|                                                                       | Co-infection                          | No consensus | 35                                          | 31     | 80      | 3                                           | 0      | 0       |
| Physiological and clinical (other)                                    | Health care professional views        | No consensus | 41                                          | 74     | 50      | 1                                           | 0      | 0       |
| Life impact (functioning)                                             | Behaviour change                      | Out          | 17                                          | 10     | 17      | 4                                           | 2      | 0       |
|                                                                       | Sleep                                 | Out          | 16                                          | 19     | 17      | 6                                           | 5      | 0       |
| Life impact (health related quality of life)                          | Quality of life                       | No consensus | 41                                          | 21     | 80      | 1                                           | 0      | 0       |
| Life impact (tolerability/acceptability)                              | Compliance with treatments            | No consensus | 37                                          | 62     | 67      | 6                                           | 0      | 0       |
| Life impact (carer satisfaction/delivery of care)                     | Parents views                         | No consensus | 55                                          | 64     | 67      | 1                                           | 0      | 0       |
| Resource use (hospital related short term)                            | Emergency service use                 | No consensus | 59                                          | 27     | 50      | 2                                           | 0      | 0       |
|                                                                       | Hospital bed availability             | No consensus | 55                                          | 59     | 67      | 6                                           | 2      | 0       |
|                                                                       | Emergency department (ED)             | No consensus | 69                                          | 54     | 83      | 2                                           | 2      | 0       |

| Domain                                      | Outcome <sup>1</sup>                                    | Consensus    | Percentage (%) of responders who scored 7-9 |        |         | Percentage (%) of responders who scored 1-3 |        |         |
|---------------------------------------------|---------------------------------------------------------|--------------|---------------------------------------------|--------|---------|---------------------------------------------|--------|---------|
|                                             |                                                         |              | Medical                                     | Nurses | Parents | Medical                                     | Nurses | Parents |
|                                             | Hospital admission and readmission                      | No consensus | 76                                          | 43     | 67      | 0                                           | 0      | 0       |
|                                             | Critical care admission                                 | In           | 95                                          | 90     | 100     | 1                                           | 0      | 0       |
|                                             | Hospital length of stay                                 | No consensus | 79                                          | 55     | 67      | 1                                           | 0      | 0       |
|                                             | Time until ready for discharge from hospital            | No consensus | 77                                          | 55     | 17      | 1                                           | 0      | 0       |
| Resource use (community related short term) | Primary care use                                        | Out          | 36                                          | 27     | 50      | 3                                           | 2      | 0       |
| Resources use (economic)                    | Economic costs                                          | Out          | 36                                          | 18     | 17      | 3                                           | 3      | 17      |
| Death                                       | Death                                                   | In           | 95                                          | 98     | 100     | 1                                           | 0      | 0       |
| Adverse events                              | Adverse events                                          | No consensus | 87                                          | 67     | 83      | 0                                           | 0      | 0       |
|                                             | Serious adverse events                                  | In           | 94                                          | 83     | 100     | 0                                           | 0      | 0       |
|                                             | Long term effects of illness or treatment interventions | No consensus | 87                                          | 86     | 67      | 0                                           | 0      | 0       |

A preliminary analysis was undertaken by a separate statistician prior to the consensus meeting. The results above are those from the final analysis which identified 2 minor errors from the preliminary analysis: 'Need for medical tests' was originally classified as 'consensus out' but should have been 'no consensus'; 'Primary care use' was originally classified as 'no consensus' but should have been 'consensus out'. During the face-to-face consensus meeting **all outcomes** were discussed and there was specific time set apart to discuss 'no consensus' and 'consensus out' outcomes, therefore it was decided the discrepancies from the preliminary analysis had negligible impact on the final results.
